# Supplementary material for: Pain’s Adverse Impact on Training-Induced Performance and Neuroplasticity: A Systematic Review
Source: PubMed Central journal article supplement (PMC9581826; doi:10.1007/s11682-021-00621-6), 2022-03-18
Supplement: 11682_2021_621_MOESM1_ESM.pdf [file 11682_2021_621_MOESM1_ESM.pdf]

| Checklist for assessing methodological quality of TMS studies                 | Barbe 2018      | Boudreau 2007     | Dancey 2019     |
|-------------------------------------------------------------------------------|-----------------|-------------------|-----------------|
| <b>Were the following participant factors:</b>                                | <b>Reported</b> | <b>Controlled</b> | <b>Reported</b> |
| Age of subjects                                                               | Yes             | No                | Yes             |
| Gender of subjects                                                            | Yes             | N/A               | Yes             |
| Handedness of subjects                                                        | Yes             | Yes               | No              |
| Subjects prescribed medication                                                | No              | No                | No              |
| Use of CSN active drugs (e.g. anti-convulsant)                                | No              | No                | No              |
| Presence of neurological/psychiatric disorders when studying healthy subjects | Yes             | Yes               | Yes             |
| Any medical conditions                                                        | Yes             | Yes               | Yes             |
| History of specific repetitive motor activity                                 | No              | No                | No              |
| <b>Were the following methodological factors:</b>                             | <b>Reported</b> | <b>Controlled</b> | <b>Reported</b> |
| Position and contact of EMG electrodes                                        | Yes             | Yes               | Yes             |
| Amount of relaxation/contraction of target muscles                            | Yes             | Yes               | Yes             |
| Prior motor activity of the muscle to be tested                               | Yes             | No                | Yes             |
| Level of relaxation of muscles other than those being tested                  | N/A             | No                | N/A             |
| Coil type (size and geometry)                                                 | Yes             | Yes               | Yes             |
| Coil orientation                                                              | Yes             | Yes               | Yes             |
| Direction of induced current in the brain                                     | No              | No                | Yes             |
| Coil location and stability                                                   | No              | No                | Yes             |
| Type of stimulation used (e.g. brand)                                         | Yes             | Yes               | Yes             |
| Stimulation intensity                                                         | Yes             | N/A               | Yes             |
| Pulse shape (monophasic or biphasic)                                          | No              | No                | No              |
| Determination of optimal hotspot                                              | No              | No                | Yes             |
| The time between MEP trials                                                   | No              | No                | Yes             |
| Times between days of testing                                                 | N/A             | N/A               | Yes             |
| Subject attention (level of arousal) during testing                           | No              | No                | No              |
| Method for determining threshold (active/resting)                             | Yes             | Yes               | Yes             |
| Number of MEP measures made                                                   | Yes             | Yes               | Yes             |
| Paired puls only: Intensity of test puls                                      | N/A             | N/A               | N/A             |
| Paired puls only: Intensity of conditioning puls                              | N/A             | N/A               | N/A             |
| Paired puls only: Inter-stimulus interval                                     | N/A             | N/A               | N/A             |
| <b>Were the following analytical factors:</b>                                 | <b>Reported</b> | <b>Controlled</b> | <b>Reported</b> |
| Method for determining MEP size during analysis                               | Yes             | Yes               | Yes             |
| Size of unconditioned MEP                                                     | N/A             | N/A               | N/A             |

| De Martino 2018a |            | De Martino 2018b |            | Hoeger Bement 2014 |            | Ingham 2011 |            | Masse Alaine 2014 |            | Masse Alaine 2016 |            |
|------------------|------------|------------------|------------|--------------------|------------|-------------|------------|-------------------|------------|-------------------|------------|
| Reported         | Controlled | Reported         | Controlled | Reported           | Controlled | Reported    | Controlled | Reported          | Controlled | Reported          | Controlled |
| Yes              | Yes        | Yes              | Yes        | Yes                | Yes        | Yes         | Yes        | Yes               | Yes        | Yes               | Yes        |
| Yes              | N/A        | Yes              | N/A        | Yes                | N/A        | Yes         | N/A        | Yes               | N/A        | Yes               | N/A        |
| Yes              | Yes        | Yes              | Yes        | No                 | No         | No          | No         | Yes               | Yes        | No                | No         |
| No               | No         | No               | No         | No                 | No         | No          | No         | No                | No         | No                | No         |
| No               | No         | No               | No         | No                 | No         | No          | No         | Yes               | Yes        | Yes               | Yes        |
| Yes              | Yes        | Yes              | Yes        | Yes                | Yes        | No          | No         | Yes               | Yes        | Yes               | Yes        |
| Yes              | Yes        | Yes              | Yes        | Yes                | Yes        | Yes         | Yes        | Yes               | Yes        | Yes               | Yes        |
| Yes              | N/A        | Yes              | N/A        | Yes                | N/A        | Yes         | N/A        | Yes               | N/A        | Yes               | N/A        |
| Yes              | N/A        | Yes              | N/A        | Yes                | N/A        | Yes         | N/A        | Yes               | N/A        | Yes               | N/A        |
| N/A              | N/A        | N/A              | N/A        | N/A                | N/A        | N/A         | N/A        | Yes               | Yes        | Yes               | Yes        |
| N/A              | N/A        | N/A              | N/A        | N/A                | N/A        | N/A         | N/A        | Yes               | Yes        | Yes               | Yes        |
| Reported         | Controlled | Reported         | Controlled | Reported           | Controlled | Reported    | Controlled | Reported          | Controlled | Reported          | Controlled |
| Yes              | Yes        | Yes              | Yes        | Yes                | Yes        | Yes         | Yes        | Yes               | Yes        | Yes               | Yes        |
| N/A              | N/A        | N/A              | N/A        | N/A                | N/A        | N/A         | N/A        | Yes               | Yes        | Yes               | Yes        |



**Tsao 2010****Vallence 2013****Reported Controlled Reported Controlled**

|     |     |     |     |
|-----|-----|-----|-----|
| Yes | Yes | Yes | Yes |
| Yes | N/A | Yes | N/A |
| Yes | Yes | Yes | Yes |
| No  | No  | No  | No  |
| No  | No  | Yes | Yes |
| N/A | N/A | Yes | Yes |
| Yes | Yes | Yes | Yes |
| No  | No  | No  | No  |

**Reported Controlled Reported Controlled**

|     |     |     |     |
|-----|-----|-----|-----|
| Yes | Yes | Yes | Yes |
| Yes | Yes | Yes | Yes |
| Yes | Yes | No  | No  |
| N/A | No  | N/A | N/A |
| Yes | Yes | Yes | Yes |
| Yes | Yes | Yes | Yes |
| Yes | Yes | Yes | Yes |
| Yes | Yes | Yes | Yes |
| Yes | Yes | Yes | Yes |
| Yes | Yes | Yes | Yes |
| No  | No  | Yes | Yes |
| Yes | Yes | N/A | N/A |
| No  | No  | No  | No  |
| No  | No  | Yes | Yes |
| Yes | Yes | N/A | N/A |
| N/A | N/A | N/A | N/A |
| N/A | N/A | N/A | N/A |
| N/A | N/A | N/A | N/A |

**Reported Controlled Reported Controlled**

|     |     |     |     |
|-----|-----|-----|-----|
| Yes | Yes | Yes | Yes |
| N/A | N/A | N/A | N/A |
